# Supplementary material
Source: PubMed Central journal article supplement (PMC2732850)
Supplement: 0900457106_0900457106SI.pdf [file 0900457106_0900457106SI.pdf]

# Supporting Information

Brenner et al. 10.1073/pnas.0900457106

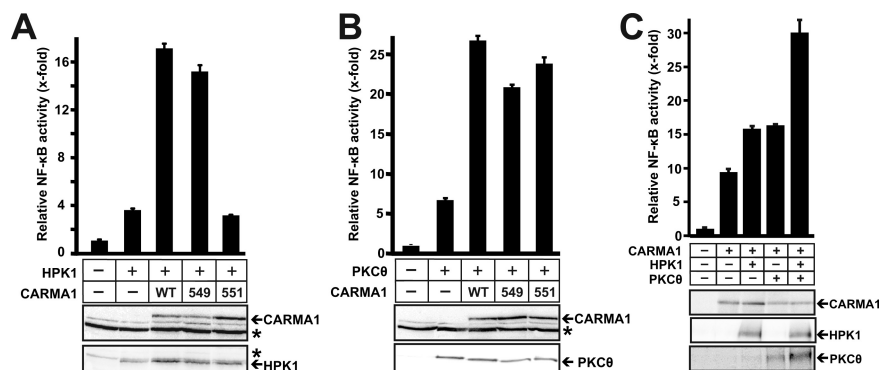

**Fig. S1.** The HPK1-specific residue S551 within the linker of CARMA1 is critical for HPK1-mediated but not PKC $\theta$ -mediated NF- $\kappa$ B activation. (A and B) 293T cells were transfected with a NF- $\kappa$ B-specific luciferase reporter plasmid and a  $\beta$ -galactosidase expression plasmid for normalization together with or without expression plasmids encoding for wild-type CARMA1 (WT), CARMA1-S549A (549), CARMA1-S551A (551), and HPK1:HA (A) or PKC $\theta$  (B). Forty-eight hours later cells were lysed and luciferase activity was measured and normalized to  $\beta$ -galactosidase activity to calculate the relative NF- $\kappa$ B activity. Expression levels of CARMA1, HPK1, and PKC $\theta$  were visualized by WB. The experiments were repeated at least three times with similar outcome. (C) 293T cells were transfected with a NF- $\kappa$ B specific reporter plasmid and expression constructs encoding either CARMA1 alone or in different combinations with HPK1 and PKC $\theta$ . Forty-eight hours later cells were lysed and analyzed as above. Expression levels of CARMA1, HPK1, and PKC $\theta$  were visualized by WB. The experiments were repeated at least three times with similar outcome.
